# Supplementary material for: Naming Convention, Interchangeability, and Patient Interest in Biosimilars
Source: Oxford University Press journal article supplement (doi:10.2337/ds19-0065), 2020-03-11
Supplement: ds190065supplementarydata.pdf [file ds190065supplementarydata.pdf]

SUPPLEMENTARY DATA

**Supplementary Materials 1. Instrument Questions and Response Options**

**Please rate the likelihood that you would use Wilkisar (insulin glargine-acxf) to treat your diabetes.**

|                          |                          |                          |                             |                          |                          |                          |
|--------------------------|--------------------------|--------------------------|-----------------------------|--------------------------|--------------------------|--------------------------|
| Extremely unlikely       | Moderately unlikely      | Slightly unlikely        | Neither likely nor unlikely | Slightly likely          | Moderately likely        | Extremely likely         |
| <input type="checkbox"/> | <input type="checkbox"/> | <input type="checkbox"/> | <input type="checkbox"/>    | <input type="checkbox"/> | <input type="checkbox"/> | <input type="checkbox"/> |

**Please rate the likelihood that you would research Wilkisar (insulin glargine-acxf) online.**

|                          |                          |                          |                             |                          |                          |                          |
|--------------------------|--------------------------|--------------------------|-----------------------------|--------------------------|--------------------------|--------------------------|
| Extremely unlikely       | Moderately unlikely      | Slightly unlikely        | Neither likely nor unlikely | Slightly likely          | Moderately likely        | Extremely likely         |
| <input type="checkbox"/> | <input type="checkbox"/> | <input type="checkbox"/> | <input type="checkbox"/>    | <input type="checkbox"/> | <input type="checkbox"/> | <input type="checkbox"/> |

**Please rate the likelihood that you would ask your doctor about Wilkisar (insulin glargine-acxf) to treat your diabetes.**

|                          |                          |                          |                             |                          |                          |                          |
|--------------------------|--------------------------|--------------------------|-----------------------------|--------------------------|--------------------------|--------------------------|
| Extremely unlikely       | Moderately unlikely      | Slightly unlikely        | Neither likely nor unlikely | Slightly likely          | Moderately likely        | Extremely likely         |
| <input type="checkbox"/> | <input type="checkbox"/> | <input type="checkbox"/> | <input type="checkbox"/>    | <input type="checkbox"/> | <input type="checkbox"/> | <input type="checkbox"/> |

**Please rate the likelihood that you would contact your insurance provider to ask about coverage for Wilkisar (insulin glargine-acxf).**

|                          |                          |                          |                             |                          |                          |                          |
|--------------------------|--------------------------|--------------------------|-----------------------------|--------------------------|--------------------------|--------------------------|
| Extremely unlikely       | Moderately unlikely      | Slightly unlikely        | Neither likely nor unlikely | Slightly likely          | Moderately likely        | Extremely likely         |
| <input type="checkbox"/> | <input type="checkbox"/> | <input type="checkbox"/> | <input type="checkbox"/>    | <input type="checkbox"/> | <input type="checkbox"/> | <input type="checkbox"/> |

**How effective do you think Wilkisar (insulin glargine-acxf) is at treating diabetes?**

|                          |                          |                          |                                   |                          |                          |                          |
|--------------------------|--------------------------|--------------------------|-----------------------------------|--------------------------|--------------------------|--------------------------|
| Extremely ineffective    | Moderately ineffective   | Slightly ineffective     | Neither effective nor ineffective | Slightly effective       | Moderately effective     | Extremely effective      |
| <input type="checkbox"/> | <input type="checkbox"/> | <input type="checkbox"/> | <input type="checkbox"/>          | <input type="checkbox"/> | <input type="checkbox"/> | <input type="checkbox"/> |

**How similar do you think Wilkisar (insulin glargine-acxf) is to Karlanza (insulin glargine)?**

|                          |                          |                          |                          |                          |
|--------------------------|--------------------------|--------------------------|--------------------------|--------------------------|
| Not similar at all       | Slightly similar         | Moderately similar       | Very similar             | Extremely similar        |
| <input type="checkbox"/> |
